# Supplementary material
Source: PubMed Central journal article supplement (PMC3739700)
Supplement: NIHMS500791-supplement-01.pdf [file NIHMS500791-supplement-01.pdf]

## **Mutations of *DNAH11* in Primary Ciliary Dyskinesia Patients with Normal Ciliary Ultrastructure**

Michael R Knowles<sup>1</sup>, Margaret W Leigh<sup>2</sup>, Johnny L Carson<sup>2</sup>, Stephanie D Davis<sup>2</sup>, Sharon D Dell<sup>3</sup>, Thomas W Ferkol<sup>4</sup>, Kenneth N Olivier<sup>5</sup>, Scott D Sagel<sup>6</sup>, Margaret Rosenfeld<sup>7</sup>, Kimberlie A. Burns<sup>1</sup>, Susan L Minnix<sup>1</sup>, Michael C Armstrong<sup>1</sup>, Adriana Lori<sup>1</sup>, Milan J Hazucha<sup>1</sup>, Niki T Loges<sup>8,10,11</sup>, Heike Olbrich<sup>10</sup>, Anita Becker-Heck<sup>8,10,11</sup>, Miriam Schmidts<sup>8</sup>, Claudius Werner<sup>10</sup>, Heymut Omran<sup>8,10</sup>, Maimoona A Zariwala<sup>9</sup>, and the Genetic Disorders of Mucociliary Clearance Consortium.

1. Department of Medicine, UNC School of Medicine, Chapel Hill, NC, USA.
2. Department of Pediatrics, UNC School of Medicine, Chapel Hill, NC, USA.
3. Child Health Evaluative Sciences, Research Institute, The Hospital for Sick Children, Toronto, Ontario, Canada.
4. Department of Pediatrics, Washington University School of Medicine, St. Louis, MO, USA.
5. Laboratory of Clinical Infectious Diseases, National Institute of Allergy and Infectious Diseases, Bethesda, MD, USA.
6. Department of Pediatrics, University of Colorado School of Medicine, Denver, CO, USA.
7. Children's Hospital and Regional Medical Center, Seattle, WA, USA.
8. Department of Pediatrics and Adolescent Medicine, University Hospital, Freiburg, Germany.
9. Department of Pathology/Lab Medicine, UNC School of Medicine, Chapel Hill, NC, USA.
10. Universitätsklinikum Münster; Klinik und Poliklinik für Kinder- und Jugendmedizin - Allgemeine Pädiatrie -; Albert-Schweitzer-Str. 33; 48149 Münster; Germany.
11. Faculty of Biology, Albert-Ludwigs-University Freiburg, Hauptstrasse 1, 79104 Freiburg, Germany

## **Online Data Supplement**

## **MATERIALS AND METHODS:**

**Subjects; Clinical Evaluation:** This study was carried out using 163 unrelated families (total 195 patients) with PCD and 13 unrelated patients with isolated situs abnormalities. The majority of the patients in this study were recruited over the past 12 years (since 1999) in prospective studies of phenotype and genotype. The majority (n=98) of the patients/families were evaluated at the University of North Carolina (UNC), or at participating sites of the Genetic Disorders of Mucociliary Clearance Consortium (GDMCC) (n=14), and other specialized PCD centers in Germany (n=38), England (n=7), Italy (n=5), Australia (n=10) and Israel (n=4). The majority of the families (n=138) were of Caucasian origin from the US (n=85), Germany (n=31), Australia (n=7), Canada (n=6), Italy (n=6), and UK (n=3). Ethnicity from the remaining 36 families was a broad mixture, including South Asian (n=8), Hispanic (n=5), Asian (n=4), Turkish (n=4), Arab (n=3), Israeli (n=3), African American (n=2), Lebanese (n=2), Iranian (n=1), Brazilian (n=1), Caucasian + Hispanic (n=1) and African American + Hispanic (n=1). Ciliary ultrastructural analysis and/or immunofluorescence studies were performed on 140 of the 163 unrelated PCD subjects (and most of their sibs). The remaining 23 unrelated subjects without definitive ultrastructural results had situs inversus (n=17), or bronchiectasis and/or low nasal nitric oxide levels (n=6). Videomicroscopy studies were carried out in 109 of 163 unrelated patients. Ethnicity information was not available from 2 families. Detailed demographic information, including clinical features and situs status, is available in the supplement Table E1.

**Ciliary Waveform Analysis:** Transnasal biopsies were used immediately for ciliary beat frequency analysis at 25°C using Sisson-Ammons video analysis (SAVA) system (Ammons Engineering, Mt. Morris, MI).[E1, E2] Biopsies were viewed using either Olympus IMT-2 microscope equipped with an ES-310 Turbo monochrome high-speed video camera (Redlake,

San Diego, CA) or Nikon Diaphot inverted microscope interfaced with high speed digital camera (Basler AG, Ahrensburg, Germany). Ciliary waveform was assessed for range of motion of ciliary shafts, and ciliary activity, particularly in the distal 1/3 of ciliary shaft, as described.[E2-E4]

**Ciliary Ultrastructural Analysis:** Ultrastructural analysis of cilia was performed as described previously.[E5] Briefly, noninvasive nasal curettage was used to obtain ciliated epithelial cells from the inferior surface of nasal turbinate. The specimen was fixed in 2% glutaraldehyde + 2% paraformaldehyde + 0.5% tannic acid and processed by standard techniques to epoxy resin block. Sections were made of 90 nm thickness and post-stained with uranyl acetate and lead citrate. Zeiss EM900 operating and accelerating voltage of 50 kV at X50,000 magnification was used for examination and ciliary image preparation. Three blinded reviewers examined the electron microscopic photomicrographs for the presence or absence or shortening of outer and/or inner dynein arms, gross abnormalities of central pair or radial spokes. A defect was defined as absence or shortened outer and/or inner dynein arms, other microtubular defects (central pair and/or radial spokes abnormal), or normal ciliary ultrastructure.

**Immunofluorescence analysis:**

Analysis was carried out as previously described.[E1] In brief, transnasal brush biopsy (Cytobrush Plus; Medscand Medical, Malmö, Sweden) suspended in cell culture medium on respiratory epithelial cells were obtained, spread onto glass slides and air dried, and stored at -80°C until use. Cells were treated with 4% paraformaldehyde, 0.2% Triton X-100, and 0.5% skim milk before incubation with primary antibody (at least 2 hours) and secondary antibody (30 minutes) at room temperature. Commercially available primary antibodies were; mouse anti-acetylated alpha-tubulin and mouse anti-gamma-tubulin (Sigma Taufkirchen, Germany) and

mouse anti-DNAH9 (BD Biosciences, Heidelberg, Germany), as previously described.[E6] Commercial secondary antibodies were used (Alexa Fluor 488 and Alexa Fluor 546; Molecular Probes/Invitrogen; Eugene, OR). Confocal images were taken with a Zeiss LSM510 (Carl Zeiss Oberkochen, Germany).

**Nasal nitric Oxide analysis:** Nasal production of nitric oxide (NO) is low in PCD patients [E7], thus, it was measured as an adjunct marker for PCD, as per previously described protocol.[E8, E9] A NO analyzer sampling line was inserted into one nostril, while the contralateral nostril was left open. Online measurement of NO (in ppb) was performed on the aspirated air during velum (soft palate) closure using voluntary maneuvers or while blowing against a resistor inserted in the mouth. Measurements were obtained using either a Sievers 280 NOA analyzer (GE Analytical Instruments, Boulder, CO) or a CLD 88 SP analyzer (ECO PHYSICS AG, Duerten, Switzerland). The analyzers were calibrated according to the manufacturer's specifications. Since each analyzer used a different sampling flow rate, the measured NO values in ppb were converted to nl/min by multiplying the ppb values with a factor of 0.5 (sampling rate of 500 ml/min) for Sievers or 0.33 (330 ml/min) for CLD to determine nasal NO production. Upon reaching plateau that lasted for at least 3 seconds (~20-30 seconds after the acquisition time) the measurement was terminated. For each individual, the level of NO reported was measured in duplicate from each nostril. Since each analyzer used a different sampling flow rate, the measured NO values in ppb were converted to nl/min by multiplying the ppb values with a factor of 0.5 (sampling rate of 500 ml/min) for Sievers or 0.33 (330 ml/min) for CLD to determine nasal NO production. Care was taken to avoid subjects that had acute nasal infection and/or inflammation at the time of measurement. For comparison, nasal NO levels were also measured

in control (non-smoker, non-allergic) individuals. Statistical test was performed using a two-tailed, two-sample t test with the level of significance set at  $P < 0.05$ .

**Mutation Profiling:** Mutation profiling for the majority of the samples for all 82 exons and splice junctions was done by Sanger sequencing at the NHLBI Genotyping and Resequencing Services (RS&G) (<http://rsng.nhlbi.nih.gov/scripts/index.cfm>). In-house sequencing was done for the exons/amplicons that were either not interrogated by NHLBI RS&G or were unsuccessful. Gene-specific forward and reverse primers for PCR amplification were made for all 82 coding exons and flanking regions tagged with M13 forward and reverse sequences, respectively. Primer sequences are depicted in supplement Table E2. Genomic DNA (10-100 ng) was amplified using one unit of AmpliTaq polymerase, 400 pmol each primer, 1X PCR buffer, 1.5 mM  $MgCl_2$ , and 100 mM total dNTPs. Amplification reagents and thermal cycler used were from Applied Biosystems (Applied Biosystems, Foster City, CA). Samples were initially denatured at 94°C for 5 minutes, followed by 35 cycles of denaturation at 94°C for 30 s, annealing between 57°- 64°C for 45 s, and extension at 72°C for 45 s, followed by final extension for 10 minutes at 72°C. Amplified products were checked using 2% agarose gel electrophoresis. Successfully amplified products were treated with four units of Shrimp Alkaline Phosphatase and eight units of Exonuclease I (USB, Cleveland, OH) to clean up unused primers and dNTPs. M13 forward and reverse primers were used for the direct DNA sequencing reaction of purified PCR product, using Prism BigDye primer Cycle Sequencing Ready Reaction kit (Applied Biosystem, Foster City, CA), as per the manufacturer's instructions. In the next step, samples were purified by DyeEx spin column (Qiagen, Valencia, CA) and subjected to capillary electrophoresis using an ABI310, ABI3100, or ABI3130 automated DNA sequencer (Applied Biosystems, Foster City, CA). Sequences were analyzed using Sequencher software as well as manually. For the high

throughput sequencing efforts at NHLBI RS&G services, multiple primer sets for each exon were designed for the amplification and sequencing. Resulting sequences were base-called and assembled on the reference sequence, followed by the use of computational tools for the analysis. The output data that were provided to us included the sequence files in FASTA format, the genotype and frequency of each allele for SNP/variant, and insertion-deletion variants and Consed-compatible trace files. Possible variants and mutations were re-analyzed manually at the UNC and reconfirmed, including segregation analysis (when possible) to decipher whether the mutations were inherited *in trans*.

**Population Studies:** Allele frequencies of the missense variants and an in-frame deletion in the general population was estimated in over 104 chromosomes from anonymized non-PCD subjects (with hemophilia that is unrelated to PCD) of Caucasian ethnicity. Variants c.350A>T (p.E117V), c.5643A>T (p.Q1881H), c.5815G>A (p.G1939R), c.7148T>C (p.L2383P), c.11059A>G (p.K3687E), c.12064G>C (p.A4022P), c.13061T>A (p.L4354H), and c.13065\_13067delCCT (p.4356delL), were checked by PCR, followed by direct DNA sequencing (Supplement, Table E5). Due to the sequence-based assay, additional mutations (nonsense, splice-site, or insertion-deletion) within the amplicons tested were also analyzed and are presented (Supplement, Table E5). Plus, 1000 Genomes (<http://www.1000genomes.org/>) and dbSNP (<http://www.ncbi.nlm.nih.gov/projects/SNP/>) databases were screened for all the mutations in this study. Additionally, in silico mutation prediction program known as “Mutation Taster” (<http://neurocore.charite.de/MutationTaster/>), was used to check if a variant in question was potentially disease-causing.

Variants c.9764T>C (p.L3255S), c.11663G>A (p.R3888H), c.11804C>T (p.P3935L), c.12980T>C (p.L4327S), and c.13373C>T (p.P4458L) were amplified followed by restriction

endonuclease digestion with *Vsp I*, *Hha I*, *Hpa II*, *Taq I* and *Hpa II*, respectively. The resultant digested DNA was separated by agarose gel electrophoresis, and, depending on the fragment length, variants were categorized as being wild type, heterozygous or homozygous. For all of the amplicons, missense substitution created the restriction site, except for c.12980T>C, where substitution abrogated the restriction site. *Hha I*, *Hpa II*, *Taq I* and *Hpa II* were purchased from New England Biolabs (Ipswich, MA) and *Vsp I*, was purchased from Fermentas (Glen Burnie, MD). Results are depicted in supplement Table E5.

**cDNA Analysis:** To determine the effect of a possible splice-site variant on the mRNA transcript, reverse transcriptase-PCR (RT-PCR) was used. Either epithelial cells obtained from the inferior turbinate using noninvasive nasal curettage [E5, E7, E9] or cells from the transformed lymphoblastoid cell lines were used to extract total RNA, using the TRIzol method, and an RNAeasy mini kit (Qiagen, Valencia, CA). SuperScript II RNase kit (Invitrogen, Carlsbad, CA) was used for the first-strand cDNA synthesis. Gene-specific primers were created to encompass the exons under interrogation, which are depicted in supplement Table E3. RT-PCR was carried out on the total RNA and cyclophilin was used as a housekeeping control. For amplification, 1µl of cDNA, together with one unit of AmpliTaq Gold polymerase, 400 pmol each primer, 1X PCR buffer, 1.5 mM MgCl<sub>2</sub>, and 200 mM total dNTPs were used. All the thermal cycler and PCR reagents used were from Applied Biosystems (Applied Biosystems, Foster City, CA). Thermal cycler, PCR conditions and reagents and conditions for the sequencing were the same as described above for ‘mutation profiling’. The sizes of the amplified products were analyzed by 2% agarose gel electrophoresis. For the variants where first PCR did not yield in the product, that first PCR was used as a template (usually in 1:10 dilution) and re-PCR was carried out using same conditions. Re-PCR resulted in successful amplification, which

was then cleaned up followed by direct DNA sequencing and analysis, as described above for 'mutation profiling'. It is important to note that for all of the samples for which lymphoblastoid cell lines were used as a source of RNA, mutant transcript was preferentially amplified. The reason for this preferential amplification may be attributed to either the re-amplification step or the tissue of RNA origin.



## REFERENCES:

- E1 Fliegauf M, Olbrich H, Horvath J, et al. Mislocalization of DNAH5 and DNAH9 in respiratory cells from patients with primary ciliary dyskinesia. *Am J Respir Crit Care Med* 2005;171:1343-1349.
- E2 Zhou H, Wang X, Brighton L, et al. Increased nasal epithelial ciliary beat frequency associated with lifestyle tobacco smoke exposure. *Inhal Toxicol* 2009;21:875-881.
- E3 Schwabe GC, Hoffmann K, Loges NT, et al. Primary ciliary dyskinesia associated with normal axoneme ultrastructure is caused by *DNAH11* mutations. *Hum Mutat* 2008;29:289-298.
- E4 Smith CM, Hirst RA, Bankart MJ, et al. Cooling of cilia allows functional analysis of beat pattern for diagnostic testing. *Chest* 2010;140:186-190.
- E5 Carson JL, Collier AM. Ciliary defects: cell biology and clinical perspectives. *Adv Pediatr* 1988;35:139-165.
- E6 Reed W, Carson JL, Moats-Staats BM, et al. Characterization of an axonemal dynein heavy chain expressed early in airway epithelial ciliogenesis. *Am J Respir Cell Mol Biol* 2000;23:734-741.
- E7 Noone PG, Leigh MW, Sannuti A, et al. Primary ciliary dyskinesia: Diagnostic and phenotypic features. *Am J Respir Crit Care Med* 2004;169:459-467.

- E8 Narang I, Ersu R, Wilson NM, et al. Nitric oxide in chronic airway inflammation in children: diagnostic use and pathophysiological significance. *Thorax* 2002;57:586-589.
- E9 Zariwala M, Noone PG, Sannuti A, et al. Germline mutations in an intermediate chain dynein cause primary ciliary dyskinesia. *Am J Respir Cell Mol Biol* 2001;25:577-583.
- E10 Bartoloni L, Blouin JL, Pan Y, et al. Mutations in the *DNAH11* (axonemal heavy chain dynein type 11) gene cause one form of situs inversus totalis and most likely primary ciliary dyskinesia. *Proc Natl Acad Sci U S A* 2002;99:10282-10286.
- E11 Schwabe GC, Hoffmann K, Loges NT, et al. Primary ciliary dyskinesia associated with normal axoneme ultrastructure is caused by *DNAH11* mutations. *Hum Mutat* 2008;29:289-298.
- E12 Pifferi M, Michelucci A, Conidi ME, et al. New *DNAH11* mutations in primary ciliary dyskinesia with normal axonemal ultrastructure. *Eur Respir J* 2010;35:1413-1416.
- E13 Supp DM, Witte DP, Potter SS, et al. Mutation of an axonemal dynein affects left-right asymmetry in *inversus viscerum* mice. *Nature* 1997;389:963-966.
- E14 Porter ME, Knott JA, Gardner LC, et al. Mutations in the *SUP-PF-1* locus of *Chlamydomonas reinhardtii* identify a regulatory domain in the  $\beta$ -dynein heavy chain. *J Cell Biol* 1994;126:1495-1507.

### **SUPPLEMENT FIGURE LEGENDS:**

**Supplement Figure E1: Electron micrographs showing cross sections of cilia:** Panel A shows normal ciliary ultrastructure, including dynein arms from a healthy subject. Panels B (PCD157) and C (PCD623) shows normal dynein arm structure from the patients who harbored biallelic mutations in *DNAH11*.

**Supplement Figure E2: Additional pedigrees showing autosomal recessive mode of inheritance for *DNAH11* mutations:** Segregation analysis from family members demonstrates that mutations were inherited *in trans*.

**Supplement Figure E3: Pedigrees showing segregation analysis of *DNAH11* mutations:** Despite full sequencing, the second mutant allele was not identified in these families.

**Supplement Figure E4: cDNA analysis showing errors in the published *DNAH11* sequences.** cDNA was prepared from mRNA obtained from the nasal epithelium as well as from the transformed lymphoblastoid cell lines from two unrelated control subjects. (A) shows that the last 15 bases c.4078\_4092GCGAGTTCATAACT (5 amino-acid residues p.1360\_1364ASSIT) in exon 22 that is part of the published *DNAH11* sequence are not present. (B) shows that the 6 bases c.5476\_5481CAAGTT that is part of the published *DNAH11* sequence designated as exon 32 in ensemble database are not present. Multiple sequence alignment (as per ensemble or NCBI) against 8 orthologs and 2 paralogs of the axonemal heavy chain dyneins of outer arms are shown. For the majority of the homologs, amino-acid residues based on published human *DNAH11* sequences at the p.1360\_1364ASSIT and p.1826\_27QV location are not present. It is

pertinent to mention that few species, for examples, Pt\_DNAH11 and Pp\_DNAH11 for p.1360\_1364ASSIT and Pt\_DNAH11 for p.1826\_27QV match the human published sequences, but these are predicted amino-acid sequences obtained from genomic sequences. Protein sequences are from *Homo sapiens* (Hs\_DNAH11, Ensembl accession no. ENSP00000330671), *Homo sapiens* (Hs\_DNAH9, Ensembl accession no. ENSP00000262442), *Homo sapiens* (Hs\_DNAH5, Ensembl accession no. ENSP00000265104), *Gorilla gorilla* (Ggo\_DNAH11, Ensembl accession no. ENSGGOP00000004678), *Cavia procellus* (Cp\_DNAH11, Ensembl accession no. ENSCPOP00000003280), *Mus Musculus* (Mm\_DNAH11, Ensembl accession no. ENSMUSP00000081867), *Gallus gallus* (Gg\_DNAH11, GenBank accession no. XP\_001232017.1), *Clamydomonas reinhardtii* (Cr\_DNAH11, Genbank accession no. Q39565.1), *Rattus norvegicus* (Rn\_DNAH11, Ensembl accession no. ENSRNOP00000007233), *Pan troglodytes* (Pt\_DNAH11, Ensembl accession no. ENSPTRP000000032421), and *Pongo pygmaeus* (Pp\_DNAH11, Ensembl accession no. ENSPPYP00000019889). Identical and similar amino-acid residues are indicated in red and light blue fonts, respectively. The gray box indicates sequences that differ from the published sequences. The updated nomenclature for the previously published mutations [E10-E14] is shown in supplement Table E7.

#### **SUPPLEMENT TABLES:**

**Supplement Table E1:** Detailed demographic and clinical phenotypes in subjects tested for *DNAH11* sequencing.

**Supplement Table E2:** *DNAH11* primers to amplify genomic DNA and sequencing.

**Supplement Table E3:** List of primers used for RT-PCR and cDNA work.

**Supplement Table E4:** *DNAH11* mutations and the corresponding protein domains

**Supplement Table E5:** Population Frequencies of *DNAH11* Variants

**Supplement Table E6:** Polymorphisms in *DNAH11* gene.

**Supplement Table E7:** *DNAH11* nomenclature based on the current Ensembl database gene annotation and updated nomenclature.

### **SUPPLEMENT MOVIES:**

**Supplement Movie E1:** Real-time videomicroscopy recording from respiratory cilia of an affected individual OP41-II:1 who harbors biallelic *DNAH11* mutations. Cilia show characteristic hyperkinetic beating pattern and reduced waveform amplitude, explaining the PCD phenotype.

**Supplement Movie E2:** Slow-motion videomicroscopy recording from respiratory cilia of an affected individual OP41-II:1 who harbors biallelic *DNAH11* mutations. Cilia show characteristic hyperkinetic beating pattern and reduced waveform amplitude, explaining the PCD phenotype.

**Supplement Table E1: Detailed demographic and clinical phenotypes in subjects tested for *DNAH11* sequencing**

| Clinical Observation                  | Ultrastructural Defects    |                      |                      |                                    |             |
|---------------------------------------|----------------------------|----------------------|----------------------|------------------------------------|-------------|
|                                       | Normal # (%)               | ODA+IDA defect # (%) | Other Defects* # (%) | Isolated Situs Abnormalities # (%) |             |
| <b>Subjects</b>                       | # of Families              | 58                   | 76                   | 29                                 | 13          |
|                                       | # of patients              | 67                   | 96                   | 32                                 | 13          |
| <b>Gender</b>                         | Male                       | 30 (45%)             | 47 (49%)             | 13 (41%)                           | 5 (38%)     |
|                                       | Female                     | 37 (55%)             | 49 (51%)             | 19 (59%)                           | 8 (62%)     |
| <b>Age Range (Months-years)</b>       |                            | 11 mo–62 yrs         | 2 mo-73 yrs          | 1-75 yrs                           | 9 mo-39 yrs |
| <b>Parental Consanguinity</b>         |                            | 3 (5%)               | 13 (17%)             | 5 (17%)                            | 3 (23%)     |
| <b>Ethnicity<sup>†</sup></b>          | Caucasian <sup>‡</sup>     | 47 (82%)             | 60 (80%)             | 22 (76%)                           | 10 (77%)    |
|                                       | Non-Caucasian <sup>§</sup> | 10 (18%)             | 15 (20%)             | 7 (24%)                            | 3 (23%)     |
| <b>Situs Status</b>                   | Situs Inversus             | 20 (30%)             | 45 (46%)             | 15 (47%)                           | 9 (69%)     |
|                                       | Situs Ambiguus             | 6 (9%)               | 6 (6%)               | 3 (9%)                             | 4 (31%)     |
|                                       | Situs Solitus              | 41 (61%)             | 45 (48%)             | 14 (44%)                           | 0           |
| <b>Neonatal RDS<sup>†</sup></b>       | Yes                        | 34 (61%)             | 60 (73%)             | 19 (79%)                           | 4 (36%)     |
|                                       | No                         | 22 (39%)             | 22 (27%)             | 5 (21%)                            | 7 (64%)     |
| <b>Otitis Media<sup>†</sup></b>       | Yes                        | 48 (79%)             | 78 (82%)             | 21 (88%)                           | 7 (58%)     |
|                                       | No                         | 13 (21%)             | 17 (18%)             | 3 (12%)                            | 5 (42%)     |
| <b>Bronchiectasis<sup>†</sup></b>     | Yes                        | 35 (66%)             | 67 (76%)             | 14 (58%)                           | 0           |
|                                       | No                         | 18 (34%)             | 21 (24%)             | 10 (42%)                           | 12 (12%)    |
| <b>Sinusitis<sup>†</sup></b>          | Yes                        | 57 (92%)             | 90 (98%)             | 24 (92%)                           | 5 (42%)     |
|                                       | No                         | 5 (8%)               | 2 (2%)               | 2 (8%)                             | 7 (58%)     |
| <b>Nasal NO (nl/min)</b>              | Mean±SD                    | 35.9±31.2            | 18.2±13.4            | 22.0±15.5                          | 243.2±103.9 |
|                                       | (# of subjects)            | (34)                 | (55)                 | (12)                               | (10)        |
| <b>Full gene sequence or excluded</b> | <i>DNAH11</i>              | 16 (27%)             | 71 (93%)             | 11 (38%)                           | 6 (46%)     |
|                                       | <i>DNAH5</i>               | 10 (17%)             | 69 (91%)             | 18 (62%)                           | 6 (46%)     |

Total of n=195 PCD patients from 163 unrelated PCD families were included in the current study.

\* 6 families had radial spokes/central pair defects, 3 families had no cilia on multiple biopsies, and ultrastructure was not available from 20 families.

† Incomplete information on some of the 195 patients (163 families).

Normal nasal NO levels, calculated from 27 healthy subjects were 376±124nl/min (mean±SD).[E7]

‡ One patient was of mixed Caucasian and Hispanic ethnicity.

§ Non-Caucasian included African American, Arab, Asian, Brazilian, Hispanic, Iranian, Israeli, Lebanese, South Asian, Turkish and one patient with mixed African American and Hispanic ethnicity.

**Abbreviations:**

ODA = Outer dynein arms, IDA = Inner dynein arms, NO = Nitric Oxide, SD = Standard Deviation

**Supplement Table E2 (page 1 of 3): *DNAH11* primers for genomic DNA amplification and sequencing\***

| Exon # | M13 tail - Forward Primer Sequence 5'-3'     | M13 tail - Reverse Primer Sequence 5'-3'        |
|--------|----------------------------------------------|-------------------------------------------------|
| 1      | GTAAAAACGACGGCCAG-CTAAGTAGCAGCAGGTGGGA       | CAGGAAAACAGCTATGAC-CTCAGGATGGGGACTTCAA          |
| 2      | GTAAAAACGACGGCCAG-CAAGAAAACTGTATACTCG        | CAGGAAAACAGCTATGAC-CTAAAATAATTTCAAATGTCAATGGAG  |
| 3      | GTAAAAACGACGGCCAG-TTATGTCATAATGATTAATAATC    | CAGGAAAACAGCTATGAC-TAFTTGTGGAGATGAGATCT         |
| 4      | GTAAAAACGACGGCCAG-CAAGAAATTTATTTTAGGAAACTAG  | CAGGAAAACAGCTATGAC-TCCTTTAAAACTATTTGGTCATTTGCAG |
| 5      | GTAAAAACGACGGCCAG-GAGTGRAAATGGAATTTAAAT      | CAGGAAAACAGCTATGAC-CGGAAGGGTAAATATCAAG          |
| 6      | GTAAAAACGACGGCCAG-AAAACAAAACAGAAATCACGT      | CAGGAAAACAGCTATGAC-CAAAAAATGTCTTTTCTGAA         |
| 7      | GTAAAAACGACGGCCAG-AGCAATGCTGGCCCAACTTTAGA    | CAGGAAAACAGCTATGAC-ACCTCCACCTATGATATA           |
| 8      | GTAAAAACGACGGCCAG-AATGTTCTTGATTTGAAACT       | CAGGAAAACAGCTATGAC-TGTAAACCTCTTTTGGTCCCT        |
| 9      | GTAAAAACGACGGCCAG-GCACAGTCAGTCAGATATAG       | CAGGAAAACAGCTATGAC-CCCTTTTCATTTAACAGCCT         |
| 10     | GTAAAAACGACGGCCAG-GAACATTTATGAGCTGAGTAT      | CAGGAAAACAGCTATGAC-ACTAGAAGAGTTACAGTC           |
| 11     | GTAAAAACGACGGCCAG-TTACAGGGTTGGAAAACCAATT     | CAGGAAAACAGCTATGAC-CTAAAGTCTAAATATGAAC          |
| 12     | GTAAAAACGACGGCCAG-CGCACATAAATTTGGTCTTGA      | CAGGAAAACAGCTATGAC-CCTCACAACTCTGACATTTTCC       |
| 13     | GTAAAAACGACGGCCAG-ACTATAATTAATGATGATGA       | CAGGAAAACAGCTATGAC-GGTGTAAAAAATATCAATATAG       |
| 14     | GTAAAAACGACGGCCAG-TAATGATATTTTACACCTTTAAGA   | CAGGAAAACAGCTATGAC-CTCAATGAAAAGATCTATAA         |
| 15     | GTAAAAACGACGGCCAG-GTGCACAACTATGCAGTCTCTTCTT  | CAGGAAAACAGCTATGAC-CCATACTCAGCCACAAATTTG        |
| 16     | GTAAAAACGACGGCCAG-GGTAATGTTATGTTGTAGAT       | CAGGAAAACAGCTATGAC-TGGTTAAACAAGCTCACCTTT        |
| 17     | GTAAAAACGACGGCCAG-GCAAGGAAAACCTTAGCATTTAAT   | CAGGAAAACAGCTATGAC-CTCTATCATGAAAACCTGGCA        |
| 18     | GTAAAAACGACGGCCAG-GCGTATTAATGTTGCCAGTTT      | CAGGAAAACAGCTATGAC-TGGCTGGCTTTACTATTTTGC        |
| 19     | GTAAAAACGACGGCCAG-AAAAAAAAGAAAGAAATTAGAG     | CAGGAAAACAGCTATGAC-CCTAGTAAAACCTTTCTTAAAAACAA   |
| 20     | GTAAAAACGACGGCCAG-TAAGCTAGTTTACCAAGTT        | CAGGAAAACAGCTATGAC-TAACAGCAAAAACAAAGAC          |
| 21     | GTAAAAACGACGGCCAG-TTTTCCCGTTAAAAAATCAAAGATTG | CAGGAAAACAGCTATGAC-TAATATAGGCTCCACAAA           |
| 22     | GTAAAAACGACGGCCAG-TCGTGACAACTTTTGTGTTGGTGA   | CAGGAAAACAGCTATGAC-TCTGCTATCACTCTGTTA           |
| 23     | GTAAAAACGACGGCCAG-TCAAAATGCTTTCACTCTTTT      | CAGGAAAACAGCTATGAC-AAGTAGAGGCTATGCTGAG          |
| 24     | GTAAAAACGACGGCCAG-AGATGTACTCAGCACCTGAC       | CAGGAAAACAGCTATGAC-CCCAGGACATCAAAAAGGAC         |
| 25     | GTAAAAACGACGGCCAG-CAATAATACTTGATATCAGT       | CAGGAAAACAGCTATGAC-CCCTATATATACAATATATTGTC      |
| 26     | GTAAAAACGACGGCCAG-AGATATACATGCTAGGTTCT       | CAGGAAAACAGCTATGAC-TTATATTACCTGGCCCTTTG         |
| 27     | GTAAAAACGACGGCCAG-GAAGTATCTTTGACCTTTGCC      | CAGGAAAACAGCTATGAC-CACCTCCATAAACACAGTATT        |
| 28     | GTAAAAACGACGGCCAG-TACCTGTTAAAACAGTGAAGTT     | CAGGAAAACAGCTATGAC-AGCATTTTGACAATGATAGA         |
| 29     | GTAAAAACGACGGCCAG-ATTATCAGAATATACCTA         | CAGGAAAACAGCTATGAC-ATGAGTAGAAAACCTGGGACC        |

Continues.

Supplement Table E2 continues (page 2 of 3):

| Exon # | M13 tail - Forward Primer Sequence 5'-3'     | M13 tail - Reverse Primer Sequence 5'-3' |
|--------|----------------------------------------------|------------------------------------------|
| 30     | GTAAAAACGACGGCCAG-GCCCTTAGAGCCAGTAGGAGGA     | CAGGAAACAGCTATGAC-CACAGATGACACTCGGTAA    |
| 31     | GTAAAAACGACGGCCAG-ATTTGTTTGCAAAATAAAATC      | CAGGAAACAGCTATGAC-GACTAATTTAAAACATACAAC  |
| 32     | GTAAAAACGACGGCCAG-GAGTATAAAGTTACAAGA         | CAGGAAACAGCTATGAC-TCACATAGTTTCATTTGTTTC  |
| 33     | GTAAAAACGACGGCCAG-GTATTTTATGCTACTATCAC       | CAGGAAACAGCTATGAC-CAGGAATAATGTTAGAGAAT   |
| 34     | GTAAAAACGACGGCCAG-GTAAGTTAGTAAGAGAAT         | CAGGAAACAGCTATGAC-CTTTTATCTATTTTCATGAG   |
| 35     | GTAAAAACGACGGCCAG-GAAAATTAACACAGAAATAAAC     | CAGGAAACAGCTATGAC-AGCCCAAGGAATCATATATAG  |
| 36     | GTAAAAACGACGGCCAG-AATAATTATGATCTGCTTAGGAATG  | CAGGAAACAGCTATGAC-ACTTTATCCATGTAACCAAAA  |
| 37     | GTAAAAACGACGGCCAG-GAATCATTAAAGTGTGTATT       | CAGGAAACAGCTATGAC-CATCCAGGCCATATCTTTTC   |
| 38     | GTAAAAACGACGGCCAG-AATACAAAACATCTTTTAG        | CAGGAAACAGCTATGAC-AGATCTCTATTTAAGGTTAG   |
| 38     | GTAAAAACGACGGCCAG-TGCCAICTTAATGGAGAACAG      | CAGGAAACAGCTATGAC-TCCTTGCCATATGAAAATGCT  |
| 39     | GTAAAAACGACGGCCAG-GGCTGGCTTGGGTGTAAGGAA      | CAGGAAACAGCTATGAC-AGCAGCAAGATTTCCAGTCT   |
| 40     | GTAAAAACGACGGCCAG-TCGTTTTTATTTAGTATTA        | CAGGAAACAGCTATGAC-AGCAACACTTTATCAAAAAT   |
| 41     | GTAAAAACGACGGCCAG-ATGTGTGGCTGAAAAGGTGT       | CAGGAAACAGCTATGAC-TCCCAGGTTAATGAGCAAAA   |
| 42     | GTAAAAACGACGGCCAG-GGTAGGGGAAAAGTACTTTGTT     | CAGGAAACAGCTATGAC-TCCTTCCAGAGATGGATGG    |
| 43     | GTAAAAACGACGGCCAG-GTCCTTGAAAGTGTTCACCA       | CAGGAAACAGCTATGAC-AAGATCCAGGGAAACATGGGG  |
| 44     | GTAAAAACGACGGCCAG-CACAGCTGGGAAAAAATAATGTAATC | CAGGAAACAGCTATGAC-AAAAGGTACAGATCACAT     |
| 45     | GTAAAAACGACGGCCAG-GATGGTATATGGCAATTTTAGGT    | CAGGAAACAGCTATGAC-GGAAATCATGAGCCAAATTA   |
| 46     | GTAAAAACGACGGCCAG-TTTTGGAAATGCCCTCTCTCTC     | CAGGAAACAGCTATGAC-GCCCCAAGCAACAACACTTAAA |
| 47     | GTAAAAACGACGGCCAG-ACCTGAAAACCAAGGGTGGATGAAA  | CAGGAAACAGCTATGAC-CTGGGGATAAATTTGCACTTG  |
| 48     | GTAAAAACGACGGCCAG-AACTTCAAGTTTTTTGAGCTTCAG   | CAGGAAACAGCTATGAC-TAAGCTGTACTCGAAAAC     |
| 49     | GTAAAAACGACGGCCAG-GCACTAAAAAAGCTACATGGT      | CAGGAAACAGCTATGAC-CCATAAGCCCAATTAACACCT  |
| 50     | GTAAAAACGACGGCCAG-ATTTGATGATATTTCTTTTAAAC    | CAGGAAACAGCTATGAC-TAACTTTAGTCCCATAATACC  |
| 51     | GTAAAAACGACGGCCAG-TTTTGGCAATGGCTGTGAATCCA    | CAGGAAACAGCTATGAC-AGTGCTTAGTATGATCTA     |
| 52     | GTAAAAACGACGGCCAG-TAAACAGAAACAGACATAGTCC     | CAGGAAACAGCTATGAC-TATCTGCCAAGCAGAAAGGGT  |
| 53     | GTAAAAACGACGGCCAG-CCACAGTGTATGGCGATACAGTTA   | CAGGAAACAGCTATGAC-TCTCATCCATATAACACAGAC  |
| 54     | GTAAAAACGACGGCCAG-TTAAACTCTTACCATTTA         | CAGGAAACAGCTATGAC-CACGTCTTTTCAAAAATGCA   |
| 55     | GTAAAAACGACGGCCAG-TTGCCCCCAATGCTCCACAGAT     | CAGGAAACAGCTATGAC-CTGTGGAAAGCACTTACCT    |
| 56     | GTAAAAACGACGGCCAG-TAAGTTGTATTTTAAATTTGAGAG   | CAGGAAACAGCTATGAC-AGAAAATGGATTTAGTAGT    |

Continues.



Supplement Table E2 continues (page 3 of 3):

| Exon # | M13 tail - Forward Primer Sequence 5'-3'    | M13 tail - Reverse Primer Sequence 5'-3'    |
|--------|---------------------------------------------|---------------------------------------------|
| 57     | GTAAAAACGACGGCCAG - AGAGACAGATGCAAGATAACA   | CAGAAAAACAGCTATGAC - GTCAAAGTGGTAATCAACGGT  |
| 58     | GTAAAAACGACGGCCAG - CTGTTTCAAAAGTACAGAGAAA  | CAGAAAAACAGCTATGAC - TTTTCATGGGTGCTTCTTTTC  |
| 59     | GTAAAAACGACGGCCAG - TGAGACTGGTTTGATAAGGA    | CAGAAAAACAGCTATGAC - TTACATTCAGCAACTATG     |
| 60     | GTAAAAACGACGGCCAG - ATGCAGCTTGCCAAATTTTGCTT | CAGAAAAACAGCTATGAC - ACCTAGAAAATTGATGTGT    |
| 61     | GTAAAAACGACGGCCAG - TCAATAAAAAAAGAGAATTGTC  | CAGAAAAACAGCTATGAC - ACACCTCATGGAAGATCGAA   |
| 62     | GTAAAAACGACGGCCAG - AAGGTTAATGCGGGGAAGAGGTT | CAGAAAAACAGCTATGAC - GGCACATTGAGTTCAGGAC    |
| 63     | GTAAAAACGACGGCCAG - TGTTCCTTATAGTGAAGTGTG   | CAGAAAAACAGCTATGAC - TGTGGGTTTTTACTACTGA    |
| 64     | GTAAAAACGACGGCCAG - CAGAAAATTTATCATGTGTTT   | CAGAAAAACAGCTATGAC - GAAACAGGCAGATAAAACAAA  |
| 65     | GTAAAAACGACGGCCAG - TTTTCTCTAAAGTTTGTCCTCA  | CAGAAAAACAGCTATGAC - TGACTATGAAAGCTAAGAG    |
| 66     | GTAAAAACGACGGCCAG - TTCTCAATCACCTGAGCTTC    | CAGAAAAACAGCTATGAC - GAAGAGCAACTTTGAAATTTG  |
| 67     | GTAAAAACGACGGCCAG - GTACTTAAACCAACCATTTCCC  | CAGAAAAACAGCTATGAC - ATTACCAGTCTGATCACA     |
| 68     | GTAAAAACGACGGCCAG - CATGTTATCTAATTTAAT      | CAGAAAAACAGCTATGAC - CTGTCTCAATAATAGTAA     |
| 69     | GTAAAAACGACGGCCAG - AAATTTTGCCCTCAATCTCAC   | CAGAAAAACAGCTATGAC - AATAAACAGAGGCATCTGC    |
| 70     | GTAAAAACGACGGCCAG - GGAGTTCAGCAGAGTATGGT    | CAGAAAAACAGCTATGAC - CCACGGCAFACATAAAGCCAA  |
| 71     | GTAAAAACGACGGCCAG - GAGAGTGAATACTATCCAGC    | CAGAAAAACAGCTATGAC - ACTCTTCAGACTACATTTCC   |
| 72     | GTAAAAACGACGGCCAG - TCCCATGTAAATAAACCTGGT   | CAGAAAAACAGCTATGAC - AAAGGAGGGAGGAGAAGG     |
| 73     | GTAAAAACGACGGCCAG - AGGAAAGTCACTCAGAAGAT    | CAGAAAAACAGCTATGAC - GCACCTGCAAAATCGCCAT    |
| 74     | GTAAAAACGACGGCCAG - GGAAAAATTTGAAATCATGGTT  | CAGAAAAACAGCTATGAC - ACATGCCCTGGGTGATTTCT   |
| 75     | GTAAAAACGACGGCCAG - ATTTGAAAACGCAGACCCCTT   | CAGAAAAACAGCTATGAC - TTTTTCACACTTGGCAGAAGA  |
| 76     | GTAAAAACGACGGCCAG - TCCTATTGACGGAGGCTTGG    | CAGAAAAACAGCTATGAC - GATTCGTAGGTTCTGGGAT    |
| 77     | GTAAAAACGACGGCCAG - GCTACCCAGACAGCAATTTGTG  | CAGAAAAACAGCTATGAC - GGTGGTGGTGTATGAGTA     |
| 78     | GTAAAAACGACGGCCAG - CAGGCACCTTCGGAAAGTCTGT  | CAGAAAAACAGCTATGAC - GCCAGTTTTGCTCCAAGTGT   |
| 79     | GTAAAAACGACGGCCAG - GTAAGCTTAAAAGTGAGGCTA   | CAGAAAAACAGCTATGAC - AGCTCCGCTGTCATAGTTCTT  |
| 80     | GTAAAAACGACGGCCAG - GCTAGCAGTGGTATFACCTTCT  | CAGAAAAACAGCTATGAC - TCTATAATGGCTGTGCTT     |
| 81     | GTAAAAACGACGGCCAG - CCAATGCCCAAGAAACCTAAA   | CAGAAAAACAGCTATGAC - GTAAGCAGAGGACAAAACAC   |
| 82     | GTAAAAACGACGGCCAG - CATTAGTAGCAAGCTGCCACAC  | CAGAAAAACAGCTATGAC - GTTAGAATAATGTGCATGGGAC |

\*Sequencing was carried out using M13 forward or reverse or both primers. Exon 38 was difficult to amplify; hence, an extra set of primer was required.

**Supplement Table E3: List of primers used for RT-PCR and cDNA work**

| Sample #                 | Mutations in Genomic DNA          | Primers Location     | 5'-3' Direction                                     | Amp. bp | Comments                                         |
|--------------------------|-----------------------------------|----------------------|-----------------------------------------------------|---------|--------------------------------------------------|
| PCD761                   | c.IVS13-1 G>C<br>(c.2275-1G>C)    | Ex 11/12             | CCGTTATCTATTTTTGGGCAATCCT                           | 1089    | PCR & Sequencing primers. Required Re-PCR        |
|                          |                                   | Ex 16                | TTCATGATCTCCTGCCTGACCT                              |         |                                                  |
| OP406-II:2               | c.IVS23+5G>T<br>(c.4254+5G>T)     | Ex 20/21             | GCGCTTGATAAGGCAAATGAAG                              | 741     | PCR & Sequencing primers. Required Re-PCR        |
|                          |                                   | Ex 26                | CCAGCTTAACACTTGCTCAATGAA<br>A                       |         |                                                  |
| OP406-II:2               | c.IVS26-1G>A<br>(c.4726-1G>A)     | Ex 23                | GCCATCACAGAGTTACAGAGCCC                             | 992     | PCR & Sequencing primers. Required Re-PCR        |
|                          |                                   | Ex 30                | TCGTAGGCCACTATGGCTTCTG                              |         |                                                  |
|                          |                                   | Ex 24/25<br>Ex 29/30 | GAGCTGGGACTGAGAAGGTTATT<br>CCACATGGCCCACACATTAC     |         |                                                  |
| PCD653*<br>(carrier dad) | c.IVS33+1G>A<br>(c.5778+1G>A)     | Ex 30                | GAAGTGTGGATTTTTGATTTCCCAG                           | 1013    | PCR & Sequencing primers. Did not require Re-PCR |
|                          |                                   | Ex 36/37             | CCCCAGTCGTAATGATCCTGC                               |         |                                                  |
| PCD108                   | c.IVS44+1G>A<br>(c.7266+1G>A)     | Ex 41/42             | TGATAACAAGGTGCTGACCCTCG                             | 918     | PCR & Sequencing primers. Required Re-PCR        |
|                          |                                   | Ex 47                | GGCATGTTTCATGTCGTCGATAAA                            |         |                                                  |
| OP98-II:1                | c.7914G>C<br>(Exon 48)            | Ex 45/46             | ATGTGCCTCTGCAGACAGTTCTCG                            | 1090    | PCR & Sequencing primers. Required Re-PCR        |
|                          |                                   | Ex 51/52             | CGACACACATGTTGCATGGCAT                              |         |                                                  |
|                          |                                   | Ex 46<br>Ex 50       | TTACATAGTATCCCGTGTGCCTTTC<br>TTGTCTCCATAAACACGGGCAG |         |                                                  |
| Control                  | To resolve discrepancy of Exon 32 | Ex 30                | GAAGTGTGGATTTTTGATTTCCCAG                           | 679     | PCR & Sequencing primers. Did not require Re-PCR |
|                          |                                   | Ex 34                | GAAGTCCACAGAGATTCGGTTGA                             |         |                                                  |
|                          |                                   | Ex 33                | GGTCTTTGGTGGTCTCTGTTTTC                             |         |                                                  |

\* RNA from affected individual PCD565 was not available hence cDNA analysis was done on the carrier father (PCD653).

**Abbreviations:**

Amp. = Amplicon size for wild type product.

bp = Base pair

**Supplement Table E4: *DNAH11* mutations and the corresponding protein domains**

| Exon / Intron | Base Change           | Amino-Acid Change | Variant type     | *Protein domain | dbSNP rs# <sup>‡</sup> |
|---------------|-----------------------|-------------------|------------------|-----------------|------------------------|
| Exon 1        | c. 350A>T             | p. E117V          | Predicted splice | N-terminal      | rs72655968             |
| Intron 13     | c. IVS13-1G>C         | p. Y759_E889del   | Splice           | N-terminal      | rs72655996             |
| Exon 14       | c. 2569C>T            | p. R857X          | Nonsense         | N-terminal      | rs72655998             |
| Exon 21       | c. 3901G>T            | p. E1301X         | Nonsense         | N-terminal      | rs72657308             |
| Intron 23     | c. IVS23+5G>T         | p. E1366_G1418del | Splice           | N-terminal      | rs72657312             |
| Exon 24       | c. 4333C>T            | p. R1445X         | Nonsense         | N-terminal      | rs72657316             |
| Exon 25       | c. 4438C>T            | p. R1480X         | Nonsense         | N-terminal      | rs72657321             |
| Exon 26       | c. 4516_4517delCT     | p. L1506SfsX10    | Frameshift       | N-terminal      | -                      |
| Intron 26     | c. IVS26-1G>A         | p. E1576AfsX4     | Splice           | N-terminal      | rs72657326             |
| Exon 33       | c.5643A>T             | p.Q1881H          | Missense         | AAA1            | -                      |
| Intron 33     | c. IVS33+1G>A         | p. V1821TfsX7     | Splice           | Motor domain    | rs72657333             |
| Exon 34       | c. 5815G>A            | p. G1939R         | Missense         | AAA1            | rs72657334             |
| Exon 37       | c. 6244C>T            | p. R2082X         | Nonsense         | Motor domain    | -                      |
| Exon 44       | c. 7148T>C            | p. L2383P         | Missense         | Motor domain    | rs72657353             |
| Intron 44     | c. IVS44+1G>A         | p. T2379_Q2422del | Splice           | Motor domain    | rs72657354             |
| Exon 48       | c. 7914G>C            | p. W2604X         | †Splice          | AAA3            | rs72657362             |
| Exon 56       | c. 9113_16delAAGA     | p. K3038TfsX13    | Missense         | AAA4            | -                      |
| Exon 60       | c. 9764T>C            | p. L3255S         | Missense         | MTB             | rs72657387             |
| Exon 63       | c. 10324C>T           | p. Q3442X         | Nonsense         | HELIX 2         | rs72657393             |
| Exon 71       | c. 11663G>A           | p. R3888H         | Missense         | Motor domain    | rs72658812             |
| Exon 72       | c. 11804C>T           | p. P3935L         | Missense         | AAA6            | rs72658814             |
| Exon 73       | c. 11929G>T           | p. E3977X         | Nonsense         | AAA6            | rs72658817             |
| Exon 74       | c. 12064G>C           | p. A4022P         | Missense         | AAA6            | rs72658819             |
| Exon 77       | c. 12697C>T           | p. Q4233X         | Nonsense         | C-terminal      | rs72658823             |
| Exon 79       | c. 12980T>C           | p. L4327S         | Missense         | C-terminal      | rs72658826             |
| Exon 80       | c. 13061T>A           | p. L4354H         | Missense         | C-terminal      | rs72658827             |
| Exon 80       | c. 13065_67delCCT     | p. 4356delL       | Inframe del      | C-terminal      | rs72658828             |
| Exon 80       | c. 13075C>T           | p. R4359X         | Nonsense         | C-terminal      | -                      |
| Exon 81       | c. 13213delC          | p. R4405AfsX1     | Frameshift       | C-terminal      | rs72658833             |
| Exon 82       | c. 13333_34insACCA    | p. I4445NfsX3     | Frameshift       | C-terminal      | -                      |
| Exon 82       | c. 13373C>T           | p. P4458L         | Missense         | C-terminal      | rs72658835             |
| Exon 82       | c.13504_13505insGAAGA | p.T4502RfsX14     | Frameshift       | C-terminal      | rs72658839             |

\* Protein domains are shown as represented in Bartoloni et al.[E10]

†last base of an exon causing splice defect leading to nonsense mutation.

‡ SNP database (<http://www.ncbi.nlm.nih.gov/projects/SNP/>). The rs# was based on this current study report.

**Abbreviation:**

AAA = ATPase Associated diverse cellular Activity domain

MTB = Microtubule binding domain

**Table E5: Population frequencies of the *DNAH11* variants in subjects with PCD, situs abnormalities and non-PCD control**

| Base Change                | Amino-Acid Residue Change* | DNA Variation†   | Evolutionary Conservation‡ | Variant Location                           | Method (used for controls)§ | Allele Frequency |         |                     |
|----------------------------|----------------------------|------------------|----------------------------|--------------------------------------------|-----------------------------|------------------|---------|---------------------|
|                            |                            |                  |                            |                                            |                             | Control          | PCD     | Situs Abnormalities |
| c.350A>T                   | p.E117V                    | Missense/Splice  | 80%                        | Exon 1, Canonical splice donor site        | Sequencing                  | 0/216            | 1/326   | 0/26                |
| c.IVS23+5G>T (c.4254+5G>T) | p.E1366_G1418 del          | Splice site      | 84%                        | Intron 23, Canonical splice donor site     | Sequencing                  | 0/52             | 1/326   | 0/26                |
| c.5643A>T                  | p.Q1881H                   | Missense         | 90%                        | Exon 33, 1 <sup>st</sup> AAA module        | Sequencing                  | 0/118            | 1/326   | 0/26                |
| c.IVS33+1G>A (c.5778+1G>A) | p.V1821TfsX7               | Splice site      | 100%                       | Intron 33, Canonical splice donor site     | Sequencing                  | 0/118            | 1/326   | 0/26                |
| c.5815G>A                  | p.G1939R                   | Missense         | 100%                       | Exon 34, 1 <sup>st</sup> AAA module        | Sequencing                  | 0/114            | 1/326   | 0/26                |
| c.7148T>C                  | p.L2383P                   | Missense         | 100%                       | Exon 44                                    | Sequencing                  | 0/116            | 1/326   | 0/26                |
| c.IVS44+1G>A (c.7266+1G>A) | p.T2379_Q2422 del          | Splice site      | 100%                       | Intron 44, Canonical splice donor site     | Sequencing                  | 0/116            | 1/326   | 0/26                |
| c.9764T>C                  | p.L3255S                   | Missense         | 90%                        | Exon 60, Microtubule Binding Domain        | <i>Vsp I</i> RED            | 0/116            | 1/326   | 0/26                |
| c.11059A>G                 | p.K3687E##                 | Missense variant | 80%                        | Exon 67, 3 <sup>rd</sup> last base in exon | Sequencing                  | 0/116            | 1/326   | 0/26                |
| c.11663G>A                 | p.R3888H                   | Missense         | 100%                       | Exon 71 Turkish                            | <i>Hha I</i> RED            | 0/110            | 2/326†† | 0/26                |
| c.11804C>T                 | p.P3935L                   | Missense         | 100%                       | Exon 72, 6 <sup>th</sup> AAA module        | <i>Hpa II</i> RED           | 0/104            | 1/326   | 0/26                |
| c.12064G>C                 | p.A4022P                   | Missense         | 90%                        | Exon 74, 6 <sup>th</sup> AAA module Asian  | Sequencing                  | 0/112            | 1/326   | 0/26                |
| c.12980T>C                 | p.L4327S                   | Missense         | 100%                       | Exon 79                                    | <i>Taq I</i> RED            | 0/118            | 1/326   | 0/26                |
| c.13061T>A                 | p.L4354H                   | Missense         | 90%                        | Exon 80                                    | Sequencing                  | 0/114            | 1/326   | 0/26                |
| c.13065_67delCCT           | p.4356delL                 | Inframe Deletion | Not applicable             | Exon 80                                    | Sequencing                  | 0/114            | 1/326   | 0/26                |
| c.13075C>T                 | p.R4359X                   | Nonsense         | Not applicable             | Exon 80                                    | Sequencing                  | 0/114            | 1/326   | 0/26                |
| c.13373C>T                 | p.P4458L                   | Missense         | 100%                       | Exon 82                                    | <i>Hpa II</i> RED           | 0/110            | 1/326   | 0/26                |

- \* Variants Q1881H, R3888H and A4022P were found in patients from Lebanese, Turkish and Asian origin respectively, remaining were of Caucasian origin.
- † Missense variants were considered mutations if (1) non-synonymous substitution, (2) not found in SNP database (<http://www.ncbi.nlm.nih.gov/projects/SNP/>), and 1000 genomes (<http://www.1000genomes.org/>), (3) segregated in trans (if parental DNA available), (4) evolutionary conservation, (5) not found in non-PCD hemophilia affected Caucasian control group, and (6) considered deleterious by *in-silico* analysis (<http://neurocore.charite.de/MutationTaster/>).
- ‡ Evolutionary conservation was calculated from sequence alignment in Bartoloni et al.[E10]
- § Direct DNA sequencing was used as a method for the PCD and isolated situs abnormalities patients. RED was used for non-PCD control when possible.
- ¶ If more than one mutation was found within the amplicon being sequenced, those mutations were checked and listed in this Table.
- ‡‡ Variant was found in a homozygous state in a patient.
- ‡‡‡ Variant of uncertain significance that is close to splice junction and occurred in a heterozygous state in one patient.

**Abbreviations:** RED = Restriction Endonuclease Digestion, AAA = ATPases Associated with cellular Activities.

**Supplement Table E6(page 1 of 8): Polymorphisms in *DNAH11* gene**

| #  | Location | Base Change <sup>†</sup> | Amino-Acid Residue | db SNP #               |
|----|----------|--------------------------|--------------------|------------------------|
| 1  | 5'UTR    | c.-1749C>G               |                    | rs72655954             |
| 2  | 5'UTR    | c.-1736A>G               |                    | rs72655955             |
| 3  | 5'UTR    | c.-1537A>T               |                    | rs72655956             |
| 4  | 5'UTR    | c.-1514A>C               |                    | rs9638786              |
| 5  | 5'UTR    | c.-1487T>A               |                    | rs72655957             |
| 6  | 5'UTR    | c.-1483C>A               |                    | rs72655958             |
| 7  | 5'UTR    | c.-1464delG              |                    | rs59955613             |
| 8  | 5'UTR    | c.-1420C>T               |                    | rs6959819              |
| 9  | 5'UTR    | c.-1314A>G               |                    | rs72655959             |
| 10 | 5'UTR    | c.-1303A>G               |                    | rs976516               |
| 11 | 5'UTR    | c.-1257C>G               |                    | rs976517               |
| 12 | 5'UTR    | c.-1198G>A               |                    | rs72655960             |
| 13 | 5'UTR    | c.-1141G>A               |                    | rs976518               |
| 14 | 5'UTR    | c.-935G>A                |                    | rs72655961             |
| 15 | 5'UTR    | c.-708C>T                |                    | rs72655962             |
| 16 | 5'UTR    | c.-662T>C                |                    | rs72655963             |
| 17 | 5'UTR    | c.-552C>G                |                    | rs11773317             |
| 18 | 5'UTR    | c.-533G>A                |                    | rs72655964             |
| 19 | 5'UTR    | c.-348C>T                |                    | rs11760336             |
| 20 | 5'UTR    | c. -136T>G               |                    | rs72655965             |
| 21 | Exon 1   | c.-27C>A                 | 5'UTR              | rs72655966             |
| 22 | Exon 1   | c.54C>T                  | p.T18T             | rs2285942              |
| 23 | Exon 1   | c.58C>A                  | p.R20S             | rs72655967             |
| 24 | Exon 1   | c.100_101GA>TT           | p.E34L             | rs2285943 & rs2285944  |
| 25 | Intron 1 | c.351+68A>G              |                    | rs2285945              |
| 26 | Exon 2   | c.421G>T                 | p.D141Y            | rs72655969             |
| 27 | Intron 2 | c.495+53A>G              |                    | rs7781669              |
| 28 | Intron 2 | c.495+71C>T              |                    | rs72655970             |
| 29 | Intron 2 | c.496-169T>C             |                    | rs68042167             |
| 30 | Intron 2 | c.496-105_107delGAT      |                    | Polymorphism (44% MAF) |
| 31 | Exon 3   | c.576A>G                 | p.I192M            | rs72655972             |
| 32 | Intron 3 | c.692+137G>C             |                    | rs56130071             |
| 33 | Intron 3 | c.693-9T>C               |                    | rs72655973             |
| 34 | Exon 4   | c.705C>T                 | p.N235N            | rs10950854             |
| 35 | Intron 4 | c.882+40A>G              |                    | rs72655974             |
| 36 | Intron 4 | c.883-63A>G              |                    | rs72655975             |
| 37 | Intron 4 | c.883-44G>C              |                    | rs72655976             |
| 38 | Exon 5   | c.939C>T                 | p.S313S            | rs72655977             |
| 39 | Intron 5 | c.982+8T>A               |                    | rs72655978             |
| 40 | Intron 5 | c.982+114A>G             |                    | rs4374884              |
| 41 | Intron 5 | c.983-138A>G             |                    | rs72655979             |

Continues.

**Supplement Table E6 continues (page 2 of 8):**

| #  | Location  | Base Change <sup>†</sup>    | Amino-Acid Residue | db SNP #         |
|----|-----------|-----------------------------|--------------------|------------------|
| 42 | Intron 5  | c.983-126A>G                |                    | rs5008148        |
| 43 | Intron 5  | c.983-43A>C                 |                    | rs72655980       |
| 44 | Intron 5  | c.983-39C>A                 |                    | rs72655981       |
| 45 | Exon 6    | c.1053G>A                   | p.E351E            | SNP <sup>‡</sup> |
| 46 | Exon 6    | c.1065A>G                   | p.P355P            | rs4392792        |
| 47 | Intron 6  | c.1195-62C>T                |                    | rs56832849       |
| 48 | Exon 7    | c.1199C>T                   | p.T400I            | rs72655982       |
| 49 | Intron 7  | c.1426-112_103delTTCTGTCATT |                    | rs67521428       |
| 50 | Intron 7  | c.1426-25G>C                |                    | rs66476925       |
| 51 | Intron 7  | c.1426-9T>C                 |                    | rs72655983       |
| 52 | Exon 8    | c.1535T>A                   | p.M512K            | rs72655984       |
| 53 | Intron 8  | c.1593+28G>T                |                    | rs7804044        |
| 54 | Intron 8  | c.1593+35A>G                |                    | rs72655985       |
| 55 | Intron 8  | c.1594-70G>A                |                    | rs72655986       |
| 56 | Exon 9    | c.1680T>A                   | p.F560L            | rs72655987       |
| 57 | Exon 9    | c.1702G>A                   | p.A568T            | rs72655988       |
| 58 | Intron 9  | c.1711-234A>G               |                    | rs72655989       |
| 59 | Intron 9  | c.1711-158G>C               |                    | rs72655990       |
| 60 | Intron 10 | c.1848+90A>G                |                    | rs3810897        |
| 61 | Intron 10 | c.1848+116G>A               |                    | rs72655991       |
| 62 | Intron 10 | c.1849-73T>C                |                    | rs72655992       |
| 63 | Exon 11   | c.1916A>G                   | p.Q639R            | rs12670130       |
| 64 | Exon 11   | c.1955T>C                   | p.F652F            | rs6963535        |
| 65 | Exon 11   | c.1961C>G                   | p.S654C            | rs62441683       |
| 66 | Intron 11 | c.1973+111C>G               |                    | rs72655993       |
| 67 | Intron 12 | c.2170-27A>G                |                    | rs72655994       |
| 68 | Intron 13 | c.2275-51_52delGA           |                    | rs72655995       |
| 69 | Exon 14   | c.2454A>G                   | p.A818A            | rs4615458        |
| 70 | Exon 14   | c.2524A>G                   | p.R842G            | rs72655997       |
| 71 | Intron 14 | c.2268-5T>C                 | splice?            | rs72655999       |
| 72 | Exon 15   | c.2835A>G                   | p.Q945Q            | rs17144747       |
| 73 | Exon 15   | c.2917G>C                   | p.V973L            | rs72656000       |
| 74 | Intron 15 | c.3000+64A>G                |                    | rs6461585        |
| 75 | Intron 15 | c.3000+81C>T                |                    | rs6461586        |
| 76 | Intron 15 | c.3000+98T>C                |                    | rs72656001       |
| 77 | Intron 15 | c.3000+132A>G               |                    | rs72656002       |
| 78 | Exon 16   | c.3045G>T                   | p.E1015D           | rs72657303       |
| 79 | Exon 16   | c.3068T>C                   | p.V1023A           | rs5881483        |
| 80 | Exon 16   | c.3112G>A                   | p.A1038T           | rs10224537       |
| 81 | Exon 16   | c.3237T>C                   | p.L1079L           | rs72657304       |
| 82 | Intron 16 | c.3255+22T>C                |                    | rs11981446       |

Continues.

**Supplement Table E6 continues (page 3 of 8):**

| #   | Location  | Base Change <sup>†</sup>   | Amino-Acid Residue | db SNP #               |
|-----|-----------|----------------------------|--------------------|------------------------|
| 83  | Intron 16 | c.3256-10C>G               |                    | rs17745898             |
| 84  | Exon 17   | c.3410G>T                  | p.R1137I           | rs72657305             |
| 85  | Exon 18   | c.3630A>G                  | p.Q1210Q           | rs3827657              |
| 86  | Intron 18 | c.3648+33A>G               |                    | rs10499531             |
| 87  | Intron 20 | c.3852+16A>G               |                    | rs72657306             |
| 88  | Intron 20 | c.3853-130T>C              |                    | rs7779983              |
| 89  | Intron 20 | c.3853-79G>C               |                    | rs72657307             |
| 90  | Exon 21   | c.4001T>C                  | p.I1334T           | rs72657309             |
| 91  | Intron 21 | c.4011+25G>A               |                    | rs72657310             |
| 92  | Intron 21 | c.4011+80A>G               |                    | rs55937657             |
| 93  | Intron 21 | c.4012-160T>C              |                    | rs17746573             |
| 94  | Intron 21 | c.4012-47C>T               |                    | rs7785338              |
| 95  | Intron 22 | c.4096-52A>G               |                    | rs8180768              |
| 96  | Exon 23   | c.4136C>G                  | p.A1379G           | rs72657311             |
| 97  | Intron 23 | c.4255-100T>G              |                    | rs72657313             |
| 98  | Intron 23 | c.4255-7C>G                |                    | rs72657314             |
| 99  | Exon 24   | c.4282A>G                  | p.T1428A           | rs72657315             |
| 100 | Intron 24 | c.4377+15A>G               |                    | rs57208694             |
| 101 | Intron 24 | c.4377+114_123delAGTTTGTCC |                    | Polymorphism‡          |
| 102 | Intron 24 | c.4377+124C>T              |                    | rs68184450             |
| 103 | Intron 24 | c.4377+129G>T              |                    | rs72657317             |
| 104 | Intron 24 | c.4377+211_213delGAT       |                    | rs72657318             |
| 105 | Intron 24 | c.4377+254A>G              |                    | rs66490706             |
| 106 | Intron 24 | c.4378-356A>T              |                    | rs67504982             |
| 107 | Intron 24 | c.4378-266C>G              |                    | rs72657319             |
| 108 | Intron 24 | c.4378-17_16insATTTA       |                    | Polymorphism (42% MAF) |
| 109 | Exon 25   | c.4430T>C                  | p.V1477A           | rs72657320             |
| 110 | Exon 25   | c.4449T>C                  | p.I1483I           | rs56029521             |
| 111 | Intron 25 | c.4501-65T>C               |                    | rs72657322             |
| 112 | Intron 25 | c.4501-7A>T                |                    | rs62447794             |
| 113 | Exon 26   | c.4713T>C                  | p.D1571D           | rs72657324             |
| 114 | Intron 26 | c.4726-164A>T              |                    | rs72657325             |
| 115 | Intron 26 | c.4726-15T>C               |                    | rs17144822             |
| 116 | Exon 27   | c.4775G>T                  | p.C1592F           | rs72657327             |
| 117 | Exon 28   | c.4904A>G                  | p.D1635G           | rs17144835             |
| 118 | Intron 28 | c.4945-34A>G               |                    | rs11769118             |
| 119 | Intron 28 | c.4945-16A>G               |                    | rs72657328             |
| 120 | Intron 29 | c.5094+50A>G               |                    | rs4385378              |
| 121 | Intron 29 | c.5094+51C>T               |                    | rs72657329             |
| 122 | Intron 29 | c.5095-97G>T               |                    | rs67673671             |
| 123 | Intron 29 | c.5095-65T>C               |                    | rs72657330             |

Continues.



**Supplement Table E6 continues (page 4 of 8):**

| #   | Location  | Base Change <sup>†</sup> | Amino-Acid Residue | db SNP #   |
|-----|-----------|--------------------------|--------------------|------------|
| 124 | Intron 30 | c.5329-34C>G             |                    | rs11975280 |
| 125 | Intron 31 | c.5460+124A>T            |                    | rs72657331 |
| 126 | Intron 31 | c.5461-103T>G            |                    | rs72657332 |
| 127 | Exon 32   | c.5480G>A                | p.L1830L           | rs55666134 |
| 128 | Intron 32 | c.5621+11A>T             |                    | rs59447021 |
| 129 | Intron 32 | c.5622-38A>C             |                    | rs1866673  |
| 130 | Intron 34 | c.5924+41A>G             |                    | rs62445282 |
| 131 | Intron 34 | c.5925-76C>T             |                    | rs72657335 |
| 132 | Intron 35 | c.6041+18T>C             |                    | rs72657336 |
| 133 | Intron 35 | c.6041+45A>G             |                    | rs72657337 |
| 134 | Intron 35 | c.6041+76G>A             |                    | rs72657338 |
| 135 | Exon 36   | c.6088A>G                | p.I2023V           | rs72657339 |
| 136 | Intron 36 | c.6181-139C>T            |                    | rs72657340 |
| 137 | Intron 37 | c.6274-17A>G             |                    | rs72657341 |
| 138 | Intron 37 | c.6274-13T>G             |                    | rs2965401  |
| 139 | Exon 38   | c.6352G>A                | p.G2118S           | rs72657342 |
| 140 | Intron 38 | c.6468+55delA            |                    | rs72657343 |
| 141 | Intron 38 | c.6468+118A>C            |                    | rs72657344 |
| 142 | Intron 38 | c.6469-123A>G            |                    | rs17145061 |
| 143 | Intron 38 | c.6469-17A>G             |                    | rs1023542  |
| 144 | Intron 39 | c.6546+162C>T            |                    | rs72657345 |
| 145 | Intron 39 | c.6546+163A>G            |                    | rs57139576 |
| 146 | Intron 39 | c.6546+192G>C            |                    | rs56130320 |
| 147 | Intron 39 | c.6546+209A>G            |                    | rs72657346 |
| 148 | Intron 39 | c.6547-83C>T             |                    | rs72657347 |
| 149 | Intron 40 | c.6683+76A>C             |                    | rs17145080 |
| 150 | Intron 40 | c.6684-111G>A            |                    | rs72657348 |
| 151 | Intron 40 | c.6684-92A>G             |                    | rs72657349 |
| 152 | Intron 40 | c.6684-90C>T             |                    | rs72657350 |
| 153 | Intron 42 | c.6983+25G>A             |                    | rs72657351 |
| 154 | Intron 43 | c.7134+35T>C             |                    | rs2240470  |
| 155 | Intron 43 | c.7135-104A>C            |                    | rs72657352 |
| 156 | Intron 44 | c.7266+80T>C             |                    | rs2965416  |
| 157 | Intron 44 | c.7267-35G>C             |                    | rs72657355 |
| 158 | Intron 44 | c.7267-34A>G             |                    | rs72657356 |
| 159 | Intron 44 | c.7267-26A>G             |                    | rs16872872 |
| 160 | Exon 45   | c.7290C>T                | p.F2430F           | rs12536928 |
| 161 | Exon 45   | c.7335G>A                | p.S2445S           | rs11768670 |
| 162 | Exon 45   | c.7440+62G>A             |                    | rs20747762 |
| 163 | Intron 45 | c.7441-195G>A            |                    | rs72657357 |
| 164 | Intron 45 | c.7441-182C>G            |                    | rs2072215  |

**Continues.**

**Supplement Table E6 continues (page 5 of 8):**

| #   | Location  | Base Change <sup>†</sup> | Amino-Acid Residue | db SNP #         |
|-----|-----------|--------------------------|--------------------|------------------|
| 165 | Intron 45 | c.7441-116G>A            |                    | rs67429456       |
| 166 | Intron 45 | c.7441-105C>A            |                    | rs2072219        |
| 167 | Intron 45 | c.7441-54G>A             |                    | rs72657358       |
| 168 | Intron 45 | c.7441-53C>G             |                    | rs72657359       |
| 169 | Intron 45 | c.7441-48G>A             |                    | rs2270022        |
| 170 | Exon 46   | c.7552G>A                | p.V2518I           | rs68023059       |
| 171 | Exon 46   | c.7570T>C                | p.L2524L           | rs2072220        |
| 172 | Exon 46   | c.7626G>A                | p.T2542T           | rs2072221        |
| 173 | Intron 46 | c.7645+59A>T             |                    | rs2072222        |
| 174 | Intron 46 | c.7645+106T>C            |                    | rs72657360       |
| 175 | Intron 46 | c.7646-122A>G            |                    | rs886789         |
| 176 | Intron 46 | c.7646-119T>C            |                    | rs2965365        |
| 177 | Intron 46 | c.7646-69A>G             |                    | rs72657361       |
| 178 | Intron 46 | c.7646-25G>A             |                    | SNP <sup>‡</sup> |
| 179 | Exon 47   | c.7756T>C                | p.Y2586H           | rs2003417        |
| 180 | Exon 47   | c.7776T>C                | p.H2592H           | rs1109806        |
| 181 | Intron 47 | c.7811+45T>G             |                    | rs1029598        |
| 182 | Intron 47 | c.7812-85C>T             |                    | rs933353         |
| 183 | Intron 47 | c.7812-85C>T             |                    | rs933354         |
| 184 | Exon 48   | c.7901G>A                | p.S2634N           | rs9639393        |
| 185 | Intron 48 | c.7914+40T>C             |                    | rs933354         |
| 186 | Intron 48 | c.7914+58T>C             |                    | rs72657363       |
| 187 | Intron 48 | c.7915-134A>G            |                    | rs35579713       |
| 188 | Exon 49   | c.8023A>G                | p.I2675V           | rs72657364       |
| 189 | Exon 49   | c.8100G>A                | p.T2700T           | rs72657365       |
| 190 | Intron 49 | c.8154+23T>C             |                    | rs1029598        |
| 191 | Exon 50   | c.8279A>G                | p.Q2760R           | rs72657366       |
| 192 | Intron 50 | c.8317-56A>C             |                    | rs67536067       |
| 193 | Exon 51   | c.8478C>T                | p.H2826H           | rs28549882       |
| 194 | Intron 51 | c.8510+200G>A            |                    | rs72657367       |
| 195 | Intron 52 | c.8674-110C>T            |                    | rs72657368       |
| 196 | Exon 53   | c.8770C>T                | p.V2924M           | rs72657369       |
| 197 | Intron 53 | c.8797+23C>T             |                    | rs4355679        |
| 198 | Intron 54 | c.8940+148T>G            |                    | rs72657370       |
| 199 | Exon 55   | c.8969G>A                | p.R2990H           | rs72657371       |
| 200 | Exon 55   | c.9018G>A                | p.T3006T           | rs72657372       |
| 201 | Exon 55   | c.9097A>G                | p.I3033V           | rs72657373       |
| 202 | Intron 55 | c.9102+8G>A              |                    | rs72657374       |
| 203 | Intron 55 | c.9102+20G>A             |                    | rs60554135       |
| 204 | Intron 55 | c.9102+138G>A            |                    | rs28689873       |
| 205 | Intron 55 | c.9102+182A>G            |                    | rs2286269        |

**Continues.**

**Supplement Table E6 continues (page 6 of 8):**

| #   | Location  | Base Change <sup>†</sup> | Amino-Acid Residue | db SNP #   |
|-----|-----------|--------------------------|--------------------|------------|
| 206 | Intron 55 | c.9103-115C>G            |                    | rs72657375 |
| 207 | Intron 56 | c.9336+88T>C             |                    | rs72657377 |
| 208 | Intron 56 | c.9337-90G>A             |                    | rs4273751  |
| 209 | Intron 56 | c.9337-9T>C              |                    | rs72657378 |
| 210 | Exon 57   | c.9435G>A                | p.T3145T           | rs72657379 |
| 211 | Intron 57 | c.9483+128A>G            |                    | rs2074330  |
| 212 | Intron 57 | c.9483+147C>T            |                    | rs72657380 |
| 213 | Intron 57 | c.9483+213T>C            |                    | rs2074331  |
| 214 | Intron 57 | c.9483+278C>T            |                    | rs2285684  |
| 215 | Exon 58   | c.9561G>A                | p.L3187L           | rs6965750  |
| 216 | Intron 58 | c.9597+79A>G             |                    | rs72657381 |
| 217 | Intron 58 | c.9597+86C>A             |                    | rs4141348  |
| 218 | Intron 58 | c.9597+148C>T            |                    | rs6965795  |
| 219 | Intron 58 | c.9597+176A>G            |                    | rs72657382 |
| 220 | Intron 58 | c.9598-175C>G            |                    | rs72657383 |
| 221 | Intron 58 | c.9598-169C>G            |                    | rs11496011 |
| 222 | Intron 58 | c.9598-48G>C             |                    | rs2072093  |
| 223 | Exon 59   | c.9642A>G                | p.A3214A           | rs72657384 |
| 224 | Intron 59 | c.9741+102T>C            |                    | rs72657385 |
| 225 | Intron 59 | c.9741+119G>A            |                    | rs72657386 |
| 226 | Exon 60   | c.9774T>C                | p.Y3258Y           | rs72657388 |
| 227 | Exon 61   | c.9935A>T                | p.D3312V           | rs72657389 |
| 228 | Intron 62 | c.10165+55G>A            |                    | rs72657390 |
| 229 | Intron 62 | c.10165+84A>G            |                    | rs72657391 |
| 230 | Intron 62 | c.10166-129G>A           |                    | rs72657392 |
| 231 | Intron 62 | c.10166-44A>G            |                    | rs6969900  |
| 232 | Intron 63 | c.IVS63+49delA           |                    | rs72657394 |
| 233 | Intron 63 | c.10332+66C>T            |                    | rs72657395 |
| 234 | Intron 63 | c.10332+184T>A           |                    | rs72657396 |
| 235 | Exon 64   | c.10399G>A               | p.A3467T           | rs2214326  |
| 236 | Intron 64 | c.10568+70G>A            |                    | rs4141347  |
| 237 | Intron 64 | c.10569-11T>G            |                    | rs72657397 |
| 238 | Intron 65 | c.10691+86A>G            |                    | rs10277757 |
| 239 | Intron 65 | c.10692-67A>G            |                    | rs72657398 |
| 240 | Exon 66   | c.10738C>T               | p.R3580C           | rs72657399 |
| 241 | Exon 66   | c.10782G>A               | p.P3594P           | rs72657400 |
| 242 | Intron 66 | c.10896+58A>G            |                    | rs17145649 |
| 243 | Intron 66 | c.10896+152A>T           |                    | rs72657401 |
| 244 | Exon 67   | c.11059A>G               | p.K3687E           | rs72657402 |
| 245 | Intron 67 | c.11061+72G>A            |                    | rs28672970 |
| 246 | Intron 67 | c.11061+156T>G           |                    | rs72658803 |

Continues.

**Supplement Table E6 continues (page 7 of 8):**

| #   | Location  | Base Change <sup>†</sup> | Amino-Acid Residue | db SNP #         |
|-----|-----------|--------------------------|--------------------|------------------|
| 247 | Intron 67 | c.11061+167A>G           |                    | rs2074326        |
| 248 | Exon 68   | c.11122T>G               | p.L3708V           | rs4722064        |
| 249 | Intron 68 | c.11203-36G>A            |                    | rs72658804       |
| 250 | Intron 68 | c.11203-35T>G            |                    | rs72658805       |
| 251 | Exon 69   | c.11272T>C               | p.S3758P           | rs17145720       |
| 252 | Exon 69   | c.11298T>C               | p.H3766H           | rs4722067        |
| 253 | Exon 69   | c.11325G>A               | p.A3775A           | rs12666072       |
| 254 | Intron 69 | c.11373+129C>G           |                    | rs72658806       |
| 255 | Intron 69 | c.11373+159T>C           |                    | rs72658807       |
| 256 | Intron 70 | c.11496+28T>G            |                    | rs72658808       |
| 257 | Intron 70 | c.11496+45A>G            |                    | rs72658809       |
| 258 | Exon 71   | c.11504C>T               | p.A3835V           | rs72658810       |
| 259 | Exon 71   | c.11659A>G               | p.M3887V           | rs72658811       |
| 260 | Exon 71   | c.11674A>G               | p.M3892V           | rs72658813       |
| 261 | Intron 71 | c.11691-102G>C           |                    | rs2074329        |
| 262 | Intron 71 | c.11691-50T>C            |                    | rs11773662       |
| 263 | Intron 71 | c.11691-19delAinsTG      |                    | rs4995598        |
| 264 | Intron 72 | c.11839+27C>A            |                    | rs67137824       |
| 265 | Intron 72 | c.11839+47C>A            |                    | rs72658815       |
| 266 | Intron 72 | c.11839+57delC           |                    | rs72658816       |
| 267 | Intron 72 | c.11839+71C>T            |                    | rs11773744       |
| 268 | Intron 72 | c.11840-37T>C            |                    | rs67401326       |
| 269 | Intron 73 | c.11967+81C>G            |                    | rs72658818       |
| 270 | Exon 75   | c.12288G>A               | p.R4096R           | rs72658820       |
| 271 | Intron 75 | c.12387+45G>A            |                    | rs62445884       |
| 272 | Intron 75 | c.12388-71G>A            |                    | rs72658821       |
| 273 | Intron 75 | c.12388-42G>C            |                    | rs4439007        |
| 274 | Exon 76   | c.12493G>A               | p.V4165M           | rs64611613       |
| 275 | Intron 76 | c.12508-12T>C            |                    | rs72658822       |
| 276 | Exon 77   | c.12509C>T               | p.T4170I           | rs12537531       |
| 277 | Intron 77 | c.12750+32T>C            |                    | rs9639401        |
| 278 | Intron 77 | c.12750+125A>G           |                    | rs72658824       |
| 279 | Exon 79   | c.12943G>A               | p.A4315T           | rs72658825       |
| 280 | Exon 80   | 13128C>A                 | p.L4376L           | rs56333627       |
| 281 | Intron 80 | c.13162+23C>A            |                    | rs55714084       |
| 282 | Intron 80 | c.13162+67G>A            |                    | SNP <sup>‡</sup> |
| 283 | Intron 80 | c.13162+84G>A            |                    | rs72658829       |
| 284 | Intron 80 | c.13163-143C>G           |                    | rs72658830       |
| 285 | Intron 80 | c.13163-113C>T           |                    | rs34245961       |
| 286 | Intron 80 | c.13163-56C>T            |                    | rs72658831       |
| 287 | Intron 80 | c.13163-19T>A            |                    | rs72658832       |

**Continues.**

**Supplement Table E6 continues (page 8 of 8):**

| #   | Location    | Base Change <sup>†</sup>         | Amino-Acid Residue | db SNP #               |
|-----|-------------|----------------------------------|--------------------|------------------------|
| 288 | Exon 81     | c.13263G>C                       | p.P4421P           | rs72658834             |
| 289 | Exon 82     | c.13398C>T                       | p.P4466P           | rs72658836             |
| 290 | Exon 82     | c.13495G>A                       | p.E4499K           | SNP‡                   |
| 291 | Exon 82     | c.13502A>G                       | p.K4501R           | SNP (9% MAF)           |
| 292 | Exon 82     | c.13547C>T                       | p.A4516V           | rs72658840             |
| 293 | 3' UTR      | c.*16C>T                         |                    | rs72658841             |
| 294 | 3' UTR      | c.*20_51dup32 bp (c.*51_52ins32) |                    | Polymorphism (3% MAF)  |
| 295 | 3' UTR      | c.*88A>G                         |                    | rs7971                 |
| 296 | 3' UTR      | c.*143_144ins21 bp               |                    | Polymorphism‡          |
| 297 | 3' UTR      | c.*168C>G                        |                    | rs62445901             |
| 298 | 3' UTR      | c.*172C>T                        |                    | rs72658842             |
| 299 | 3' UTR      | c.*363C>T                        |                    | rs72658843             |
| 300 | 3' UTR      | c.*416_423delTTTCAAAA            |                    | rs72658844             |
| 301 | 3' UTR      | c.*436G>T                        |                    | rs72658845             |
| 302 | 3' UTR      | c.*492_498delCAGTGTC             |                    | rs57208060             |
| 303 | 3' UTR      | c.*546A>G                        |                    | rs12700325             |
| 304 | After 3'UTR | c.*701_704delAGAT                |                    | rs56884063             |
| 305 | After 3'UTR | c.*776A>C                        |                    | rs1128226              |
| 306 | After 3'UTR | c.*859_863delCTCTG               |                    | rs72658846             |
| 307 | After 3'UTR | c.*2161A>G                       |                    | rs72658847             |
| 308 | After 3'UTR | c.*2290_2291insA                 |                    | rs72658848             |
| 309 | After 3'UTR | c.*2394_2395ins31 bp             |                    | Polymorphism (12% MAF) |
| 310 | After 3'UTR | c.*2445C>T                       |                    | rs72658849             |

n=310 polymorphisms found during the course of this study.

† Nomenclature based on updated sequence information, base 'A' of start codon considered as +1.

Following variants were considered SNP or polymorphism for the following reasons:

‡ p.E351E: Synonymous change and seen in patient with ODA defects.

‡ c.4377+114\_123del: Far in non-coding region and seen in patient with ODA defect and *DNAH5* mutation.

‡ c.7646-25G>A: Far in non-coding region and seen in patient with ODA defect and biallelic *DNAH5* mutations.

‡ c.13162+67G>A: Far in non-coding region.

‡ p.E4499K: Non-conserved amino-acid residue and seen in patient with biallelic *DNAH11* mutations.

‡ c.\*143\_144ins: Non-coding region and seen in patient with biallelic *DNAH11* mutations.

**Abbreviations:**

MAF = Minor Allele Frequency, ODA = Outer Dynein Arms Defects, SNP = Single nucleotide polymorphism, db = database, UTR = Untranslated Region.

SNP database website: <http://www.ncbi.nlm.gov/projects/SNP/>

**Supplement Table E7: *DNAH11* mutation nomenclature based on the previously published and currently updated sequences**

| Updated         |                               | Ensembl Gene id ENSG0000105877 |                 |                               |                              |                         |
|-----------------|-------------------------------|--------------------------------|-----------------|-------------------------------|------------------------------|-------------------------|
| Exon/<br>Intron | Base Change                   | Amino-Acid Residue<br>Change   | Exon/<br>Intron | Base Change                   | Amino-Acid Residue<br>Change | References              |
| Ex 1            | c.350A>T                      | p.E117V / r.(spl?)             | Ex 1            | c.350A>T                      | p.E117V / r.(spl?)           | Current work            |
| Int 4           | c.IVS4-1G>A<br>(c.883-1G>A)   | predicted splice<br>mutation*  | Int 4           | c.IVS4-1G>A<br>(c.883-1G>A)   | predicted splice mutation    | Pifferi et al 2010      |
| Int 13          | c.IVS13-1G>C<br>(c.2275-1G>C) | p.Y759_E889del                 | Int 13          | c.IVS13-1G>C<br>(c.2275-1G>C) | p.Y759_E889del               | Current work            |
| Ex 14           | c.2569C>T                     | p.R857X                        | Ex 14           | c.2569C>T                     | p.R857X                      | Current work            |
| Ex 21           | c.3901G>T                     | p.E1301X                       | Ex 21           | c.3901G>T                     | p.E1301X                     | Current work            |
| Ex 23           | c.4130G>A                     | p.W1377X*                      | Ex 23           | c.4145G>A                     | p.W1382X                     | Pifferi et al 2010      |
| Int 23          | c.IVS23+5G>T<br>(c.4254+5G>T) | p.E1366_G1418del               | Int 23          | c.IVS23+5G>T<br>(c.4269+5G>T) | p.E1371_G1423del             | Current work            |
| Ex 24           | c.4333C>T                     | p.R1445X                       | Ex 24           | c.4348C>T                     | p.R1450X                     | Current work            |
| Ex 25           | c.4438C>T                     | p.R1480X                       | Ex 25           | c.4453C>T                     | p.R1485X                     | Current work            |
| Ex 26           | c.4516_4517delCT              | p.L1506SfsX10                  | Ex 26           | c.4531_4532delCT              | p.L1511SfsX10                | Current work            |
| Int 26          | c.IVS26-1G>A<br>(c.4726-1G>A) | p.E1576AfsX4                   | Int 26          | c.IVS26-1G>A<br>(c.4741-1G>A) | p.E1581AfsX4                 | Current work            |
| Ex 33           | c.5643A>T                     | p.Q1881H                       | Ex 34           | c.5664A>T                     | p.Q1888H                     | Current work            |
| Int 33          | c.IVS33+1G>A<br>(c.5778+1G>A) | p.V1821TfsX7                   | Int 34          | c.IVS34+1G>A<br>(c.5799+1G>A) | p.C18681fsX20                | Current work            |
| Ex 34           | c.5815G>A                     | p.G1939R                       | Ex 35           | c.5836G>A                     | p.p.G1946R                   | Current work            |
| Ex 37           | c.6244C>T                     | p.R2082X                       | Ex 38           | c.6265C>T                     | p.R2089X                     | Current work            |
| Ex 42           | c.6895G>A                     | p.E2299K†                      | Ex 43           | c.6916G>A                     | p.E2306K                     | Supp et al 1997         |
| Ex 44           | c.7148T>C                     | p.L2383P                       | Ex 45           | c.7169T>C                     | p.L2390P                     | Current work            |
| Int 44          | c.IVS44+1G>A<br>(c.7266+1G>A) | p.T2379_Q2422del               | Int 45          | c.IVS45+1G>A<br>(c.7287+1G>A) | p.T2386_Q2429del             | Current work            |
| Ex 48           | c.7914G>C                     | p.W2604X splice                | Ex 49           | c.7935G>C                     | p.W2611X splice              | Current work            |
| Ex 49           | c.8114A>G                     | p.H2705R*                      | Ex 50           | c.8135A>G                     | p.H2712R                     | Pifferi et al 2010      |
| Ex 52           | c.8533C>T                     | p.R2845X*                      | Ex 53           | c.8554C>T                     | p.R2852X                     | Bartoloni et al<br>2002 |
| Ex 56           | c.9113_9116delAAGA            | p.K3038TfsX13                  | Ex 57           | c.9134_9137delAAGA            | p.K3045TfsX13                | Current work            |

**Continues.**

Supplement Table E7 continues (page 2 of 2):

| Updated         |                       | Ensembl Gene id ENSG0000105877 |                 |                       |                              |                    |
|-----------------|-----------------------|--------------------------------|-----------------|-----------------------|------------------------------|--------------------|
| Exon/<br>Intron | Base Change           | Amino-Acid Residue<br>Change   | Exon/<br>Intron | Base Change           | Amino-Acid Residue<br>Change | References         |
| Ex 57           | c.9400_9429del30      | p.A3134_L3143del1              | Ex 58           | c.9421_9450del 30bp   | p.A3141_L3150del             | Porter et al 1994  |
| Ex 58           | c.9496_9516del21      | p.Q3166_K3172del8              | Ex 59           | c.9517_9537del 21 bp  | p.Q3173_K3179del             | Porter et al 1994  |
| Ex 60           | c.9764T>C             | p.L3255S                       | Ex 61           | c.9785T>C             | p.L3262S                     | Current work       |
| Ex 63           | c.10264G>a            | p.G3422R*                      | Ex 64           | c.10285G>A            | p.G3429R                     | Pifferi et al 2010 |
| Ex 63           | c.10324C>T            | p.Q3442X                       | Ex 64           | c.10345C>T            | p.Q3449X                     | Current work       |
| Ex 71           | c.11663G>A            | p.R3888H                       | Ex 72           | c.11684G>A            | p.R3895H                     | Current work       |
| Ex 72           | c.11804C>T            | p.P3935L                       | Ex 73           | c.11825C>T            | p.P3942L                     | Current work       |
| Ex 73           | c.11929G>T            | p.E3977X                       | Ex 74           | c.11950G>T            | p.E3984X                     | Current work       |
| Ex 74           | c.12064G>C            | p.A4022P                       | Ex 75           | c.12085G>C            | p.A4029P                     | Current work       |
| Ex 75           | c.12363C>G            | p.Y4121X*                      | Ex 76           | c.12384C>G            | p.Y4128X                     | Schwabe et al 2008 |
| Ex 77           | c.12697C>T            | p.Q4233X                       | Ex 78           | c.12718C>T            | p.Q4240X                     | Current work       |
| Ex 79           | c.12980T>C            | p.L4327S                       | Ex 80           | c.13001T>C            | p.L4334S                     | Current work       |
| Ex 80           | c.13061T>A            | p.L4354H                       | Ex 81           | c.13082T>A            | p.L4361H                     | Current work       |
| Ex 80           | c.13065_67delCCT      | p.A356delL                     | Ex 81           | c.13086_13088delCCT   | p.A363delL                   | Current work       |
| Ex 80           | c.13075C>T            | p.R4359X                       | Ex 81           | c.13096C>T            | p.R4366X                     | Current work       |
| Ex 81           | c.13213delC           | p.R4405AfsX1                   | Ex 82           | c.13234delC           | p.R4412AfsX1                 | Current work       |
| Ex 82           | c.13333_34insACCA     | p.I4445NfsX3                   | Ex 83           | c.13354_13355insACCA  | p.I4452NfsX3                 | Current work       |
| Ex 82           | c.13373C>T            | p.P4458L                       | Ex 83           | c.13394C>T            | p.P4465L                     | Current work       |
| Ex 82           | c.13504_13505insGAAGA | p.T4502RfsX14                  | Ex 83           | c.13525_13526insGAAGA | p.T4509RfsX14                | Current work       |
| Ex 82           | c.13531_13585del57    | p.A4511_A4516delinsQ*          | Ex 83           | c.13552_13608del 57bp | p.A4518_A4523delinsQ         | Schwabe et al 2008 |

\* Previously published Human *DNAH11* mutations.[E10-E12]

† Previously published as Mouse *Dnahc11* (*trc2*) mutation p.E2271K in exon 42 (p.E2249K in Sea Urchin).[E13]

‡ Previously published as *Chlamydomonas* β-DHC mutation p.3158\_3167delITDELIVSIGK (sup-pf-1-2).[E14]

§ Previously published as *Chlamydomonas* β-DHC mutation p.3190\_3196delQTEVSFAF (sup-pf-1-1).[E14]

Human *DNAH11* ensembl transcript (ENST00000409508), and protein (ENSP00000387188) identifiers (<http://uswest.ensembl.org/index.html>)

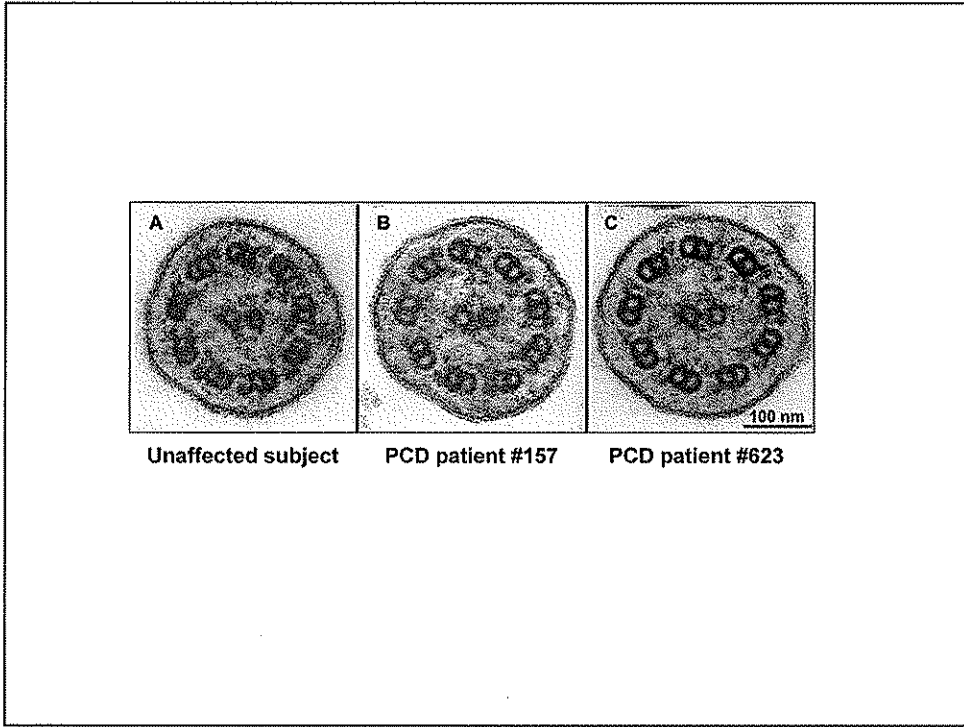

**Supplement Figure E1:**



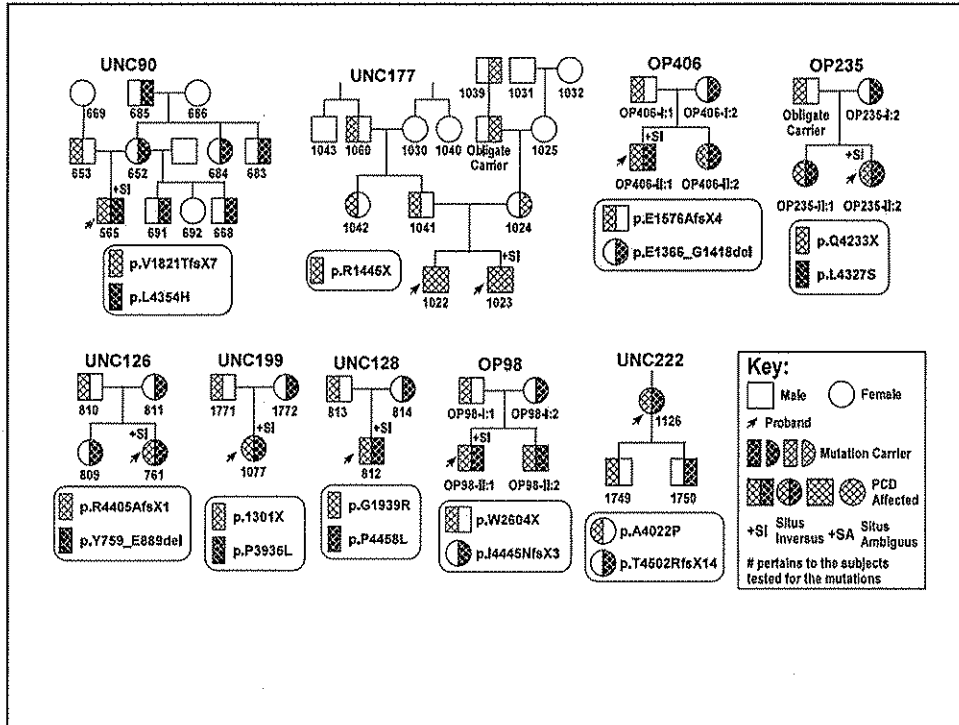

Supplement Figure E2

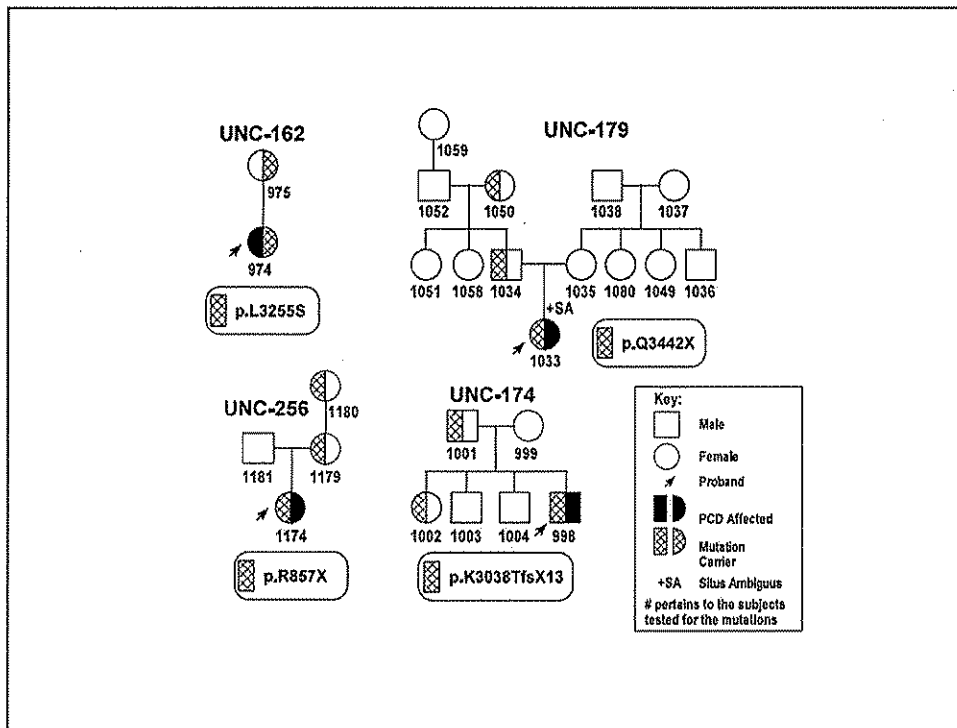

Supplement Figure E3

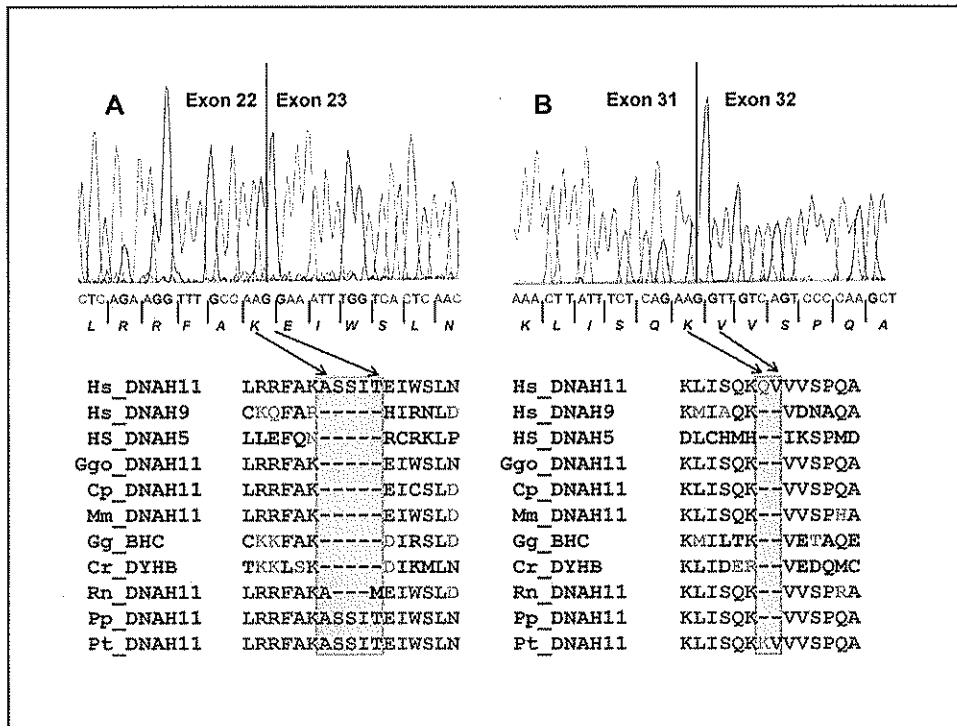

Supplement Figure E4
